# Supplementary material
Source: HighWire-hosted journal article supplement (https://jitc.bmj.com/content/5/1/35)
Supplement: media-5 [file media-5.pdf]

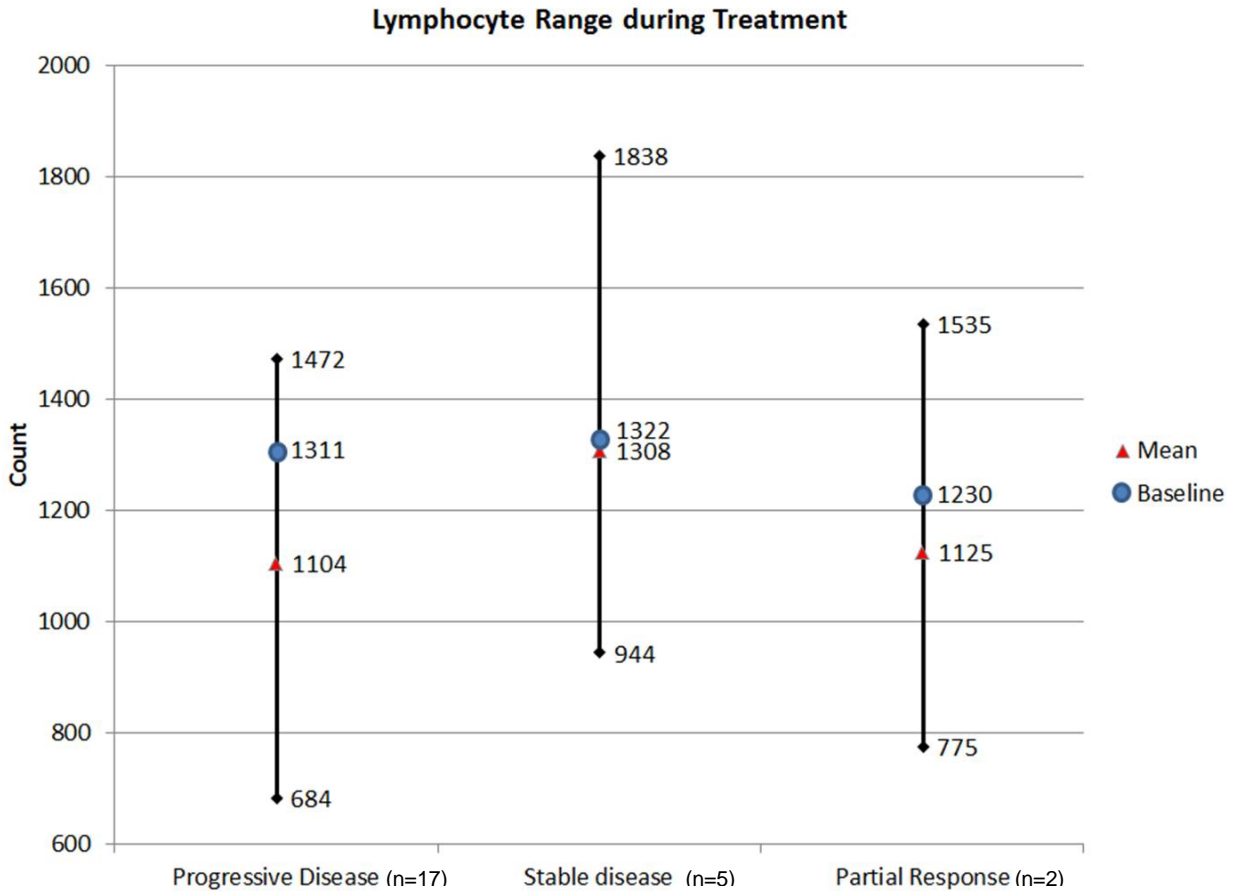

Supplemental Figure 1: Lymphocyte range during treatment.
